# Supplementary material for: ePro-ClearSee: a simple immunohistochemical method that does not require sectioning of plant samples
Source: PubMed Central journal article supplement (PMC5297246; doi:10.1038/srep42203), 2017-02-08
Supplement: srep42203-s1.pdf [file srep42203-s1.pdf]

**Title:** ePro-ClearSee: a simple immunohistochemical method that does not require sectioning of plant samples

**Author names:** Kiyotaka Nagaki\*, Naoki Yamaji and Minoru Murata

**Affiliation and address:** Institute of Plant Science and Resources, Okayama University, Kurashiki 710-0046, Japan.

**Corresponding author:** Kiyotaka Nagaki, E-mail; [nagaki@rib.okayama-u.ac.jp](mailto:nagaki@rib.okayama-u.ac.jp), Tel; +81-86-434-1208; Fax:

+81-86-434-1208

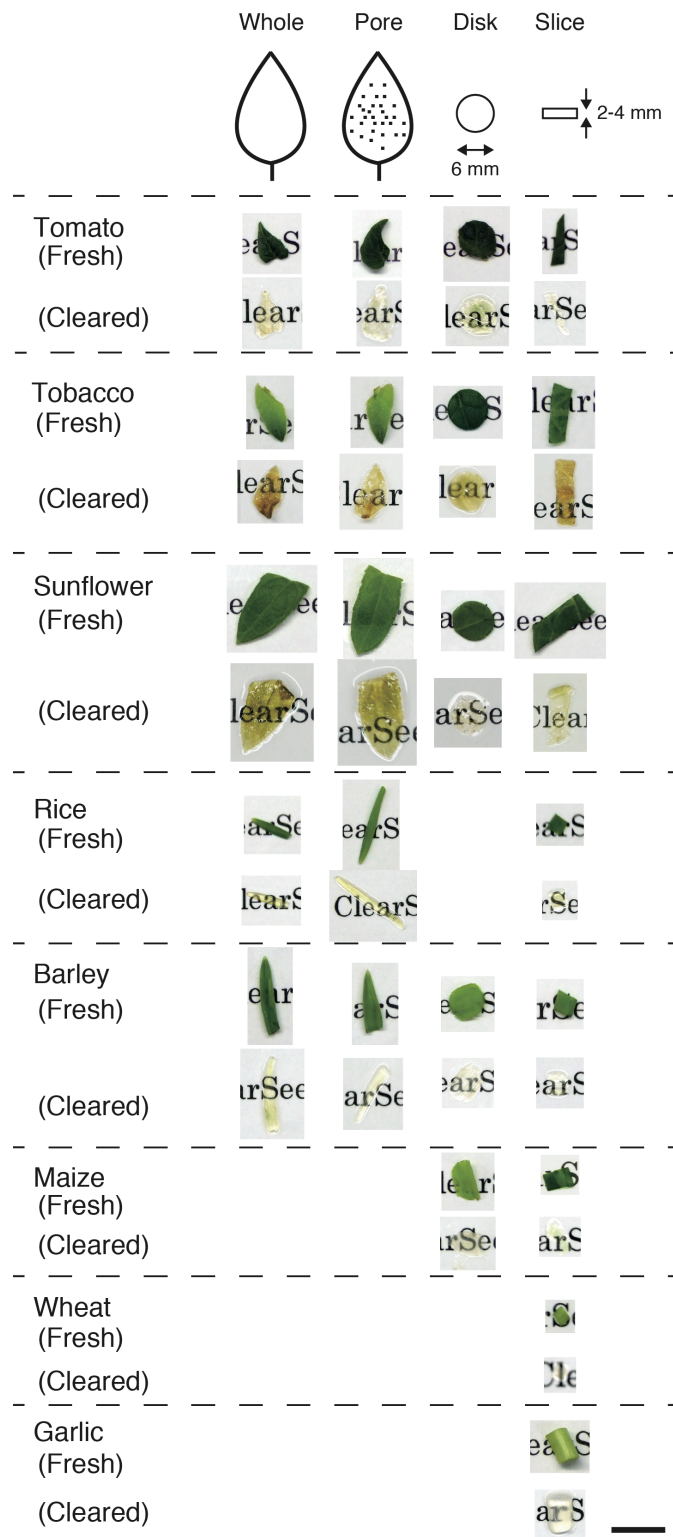

Figure S1. Clearing of leaves by the ePro-ClearSee method. Scale bar, 1 cm.

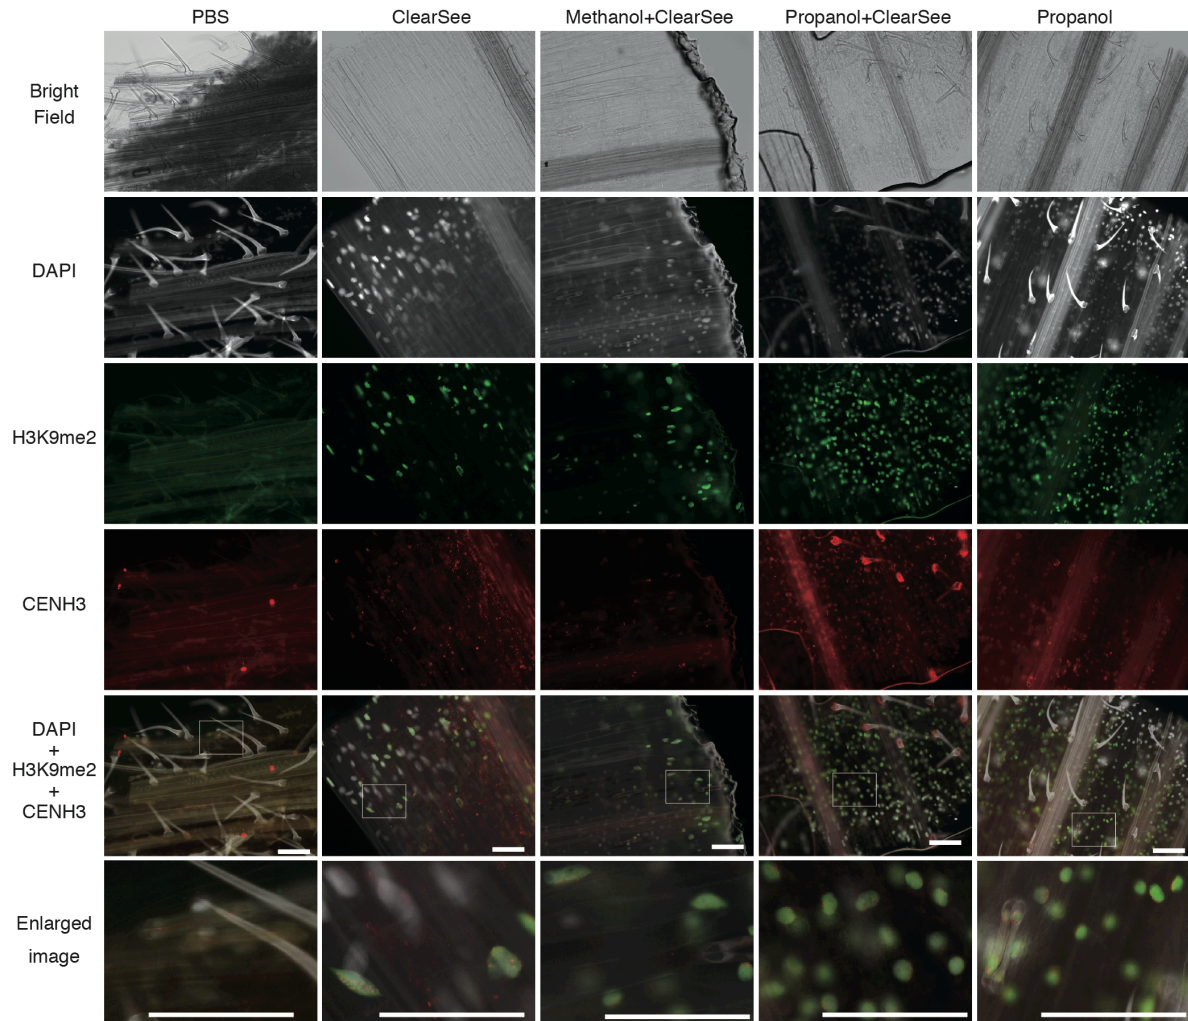

**Figure S2. Effects of clearing treatments for wheat leaves.** Scale bar, 100  $\mu\text{m}$ .

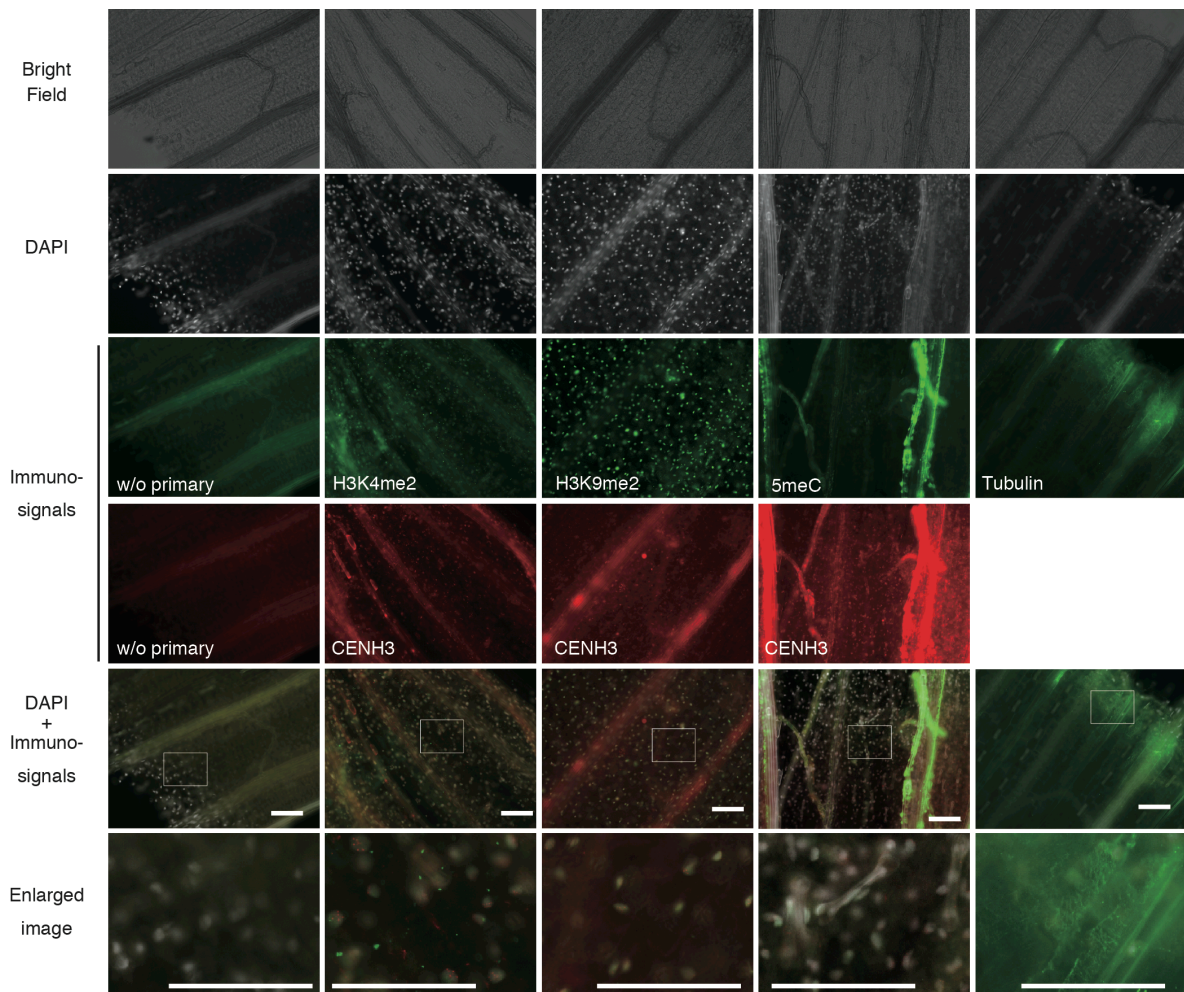

**Figure S3. Two-dimensional imaging of ePro-ClearSee treated barley leaves depicting immunosignals of epigenetic modifications and tubulin. Scale bar, 100  $\mu$ m.**

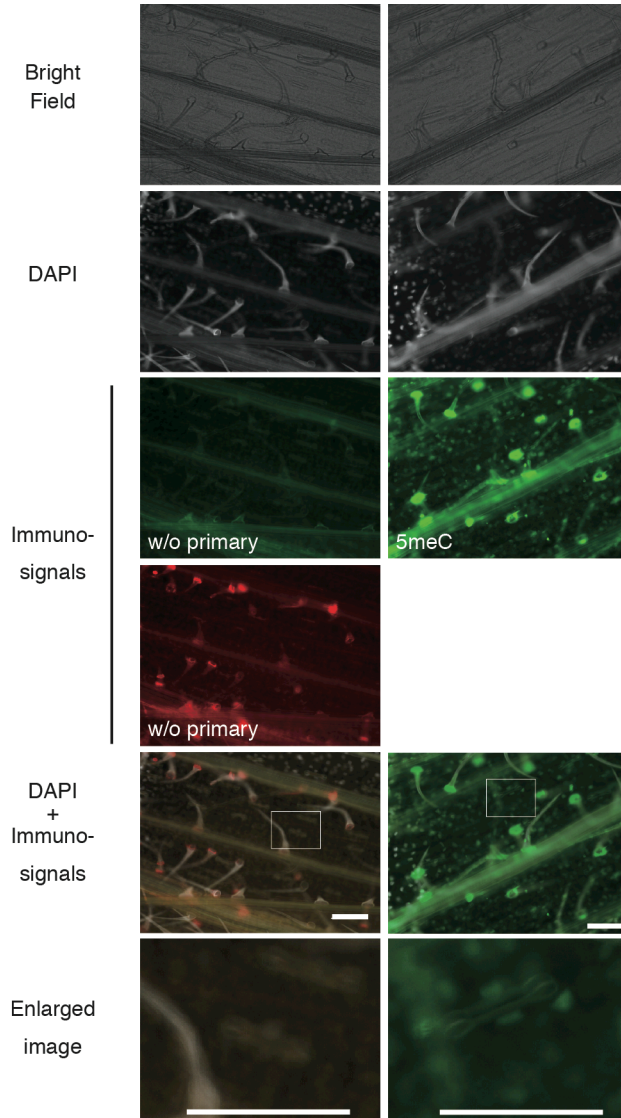

**Figure S4. Two-dimensional imaging of ePro-ClearSee treated wheat leaves depicting immunosignals of 5meC. Scale bar, 100  $\mu$ m.**

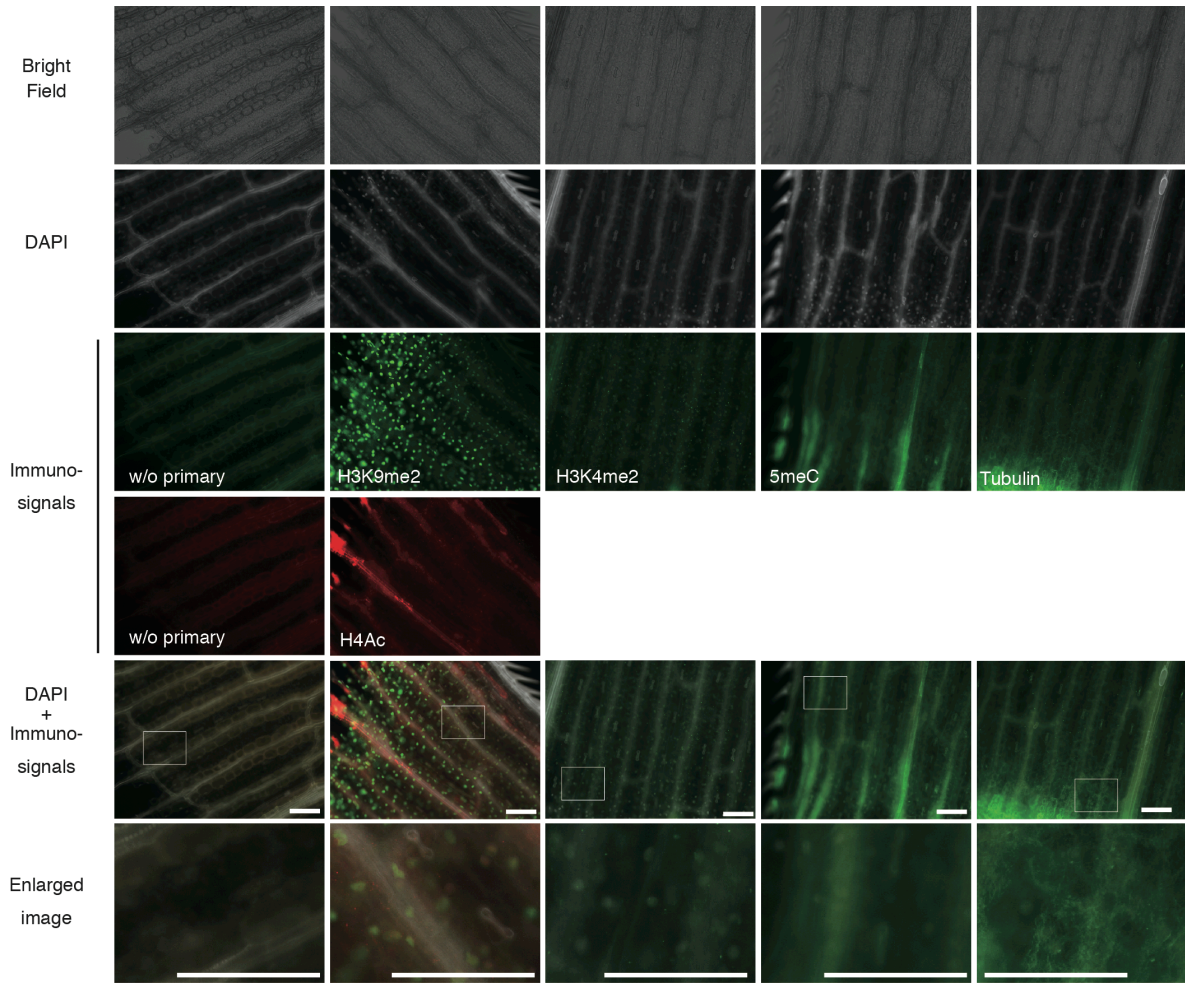

**Figure S5. Two-dimensional imaging of ePro-ClearSee treated maize leaves depicting immunosignals of epigenetic modifications and tubulin. Scale bar, 100  $\mu$ m.**

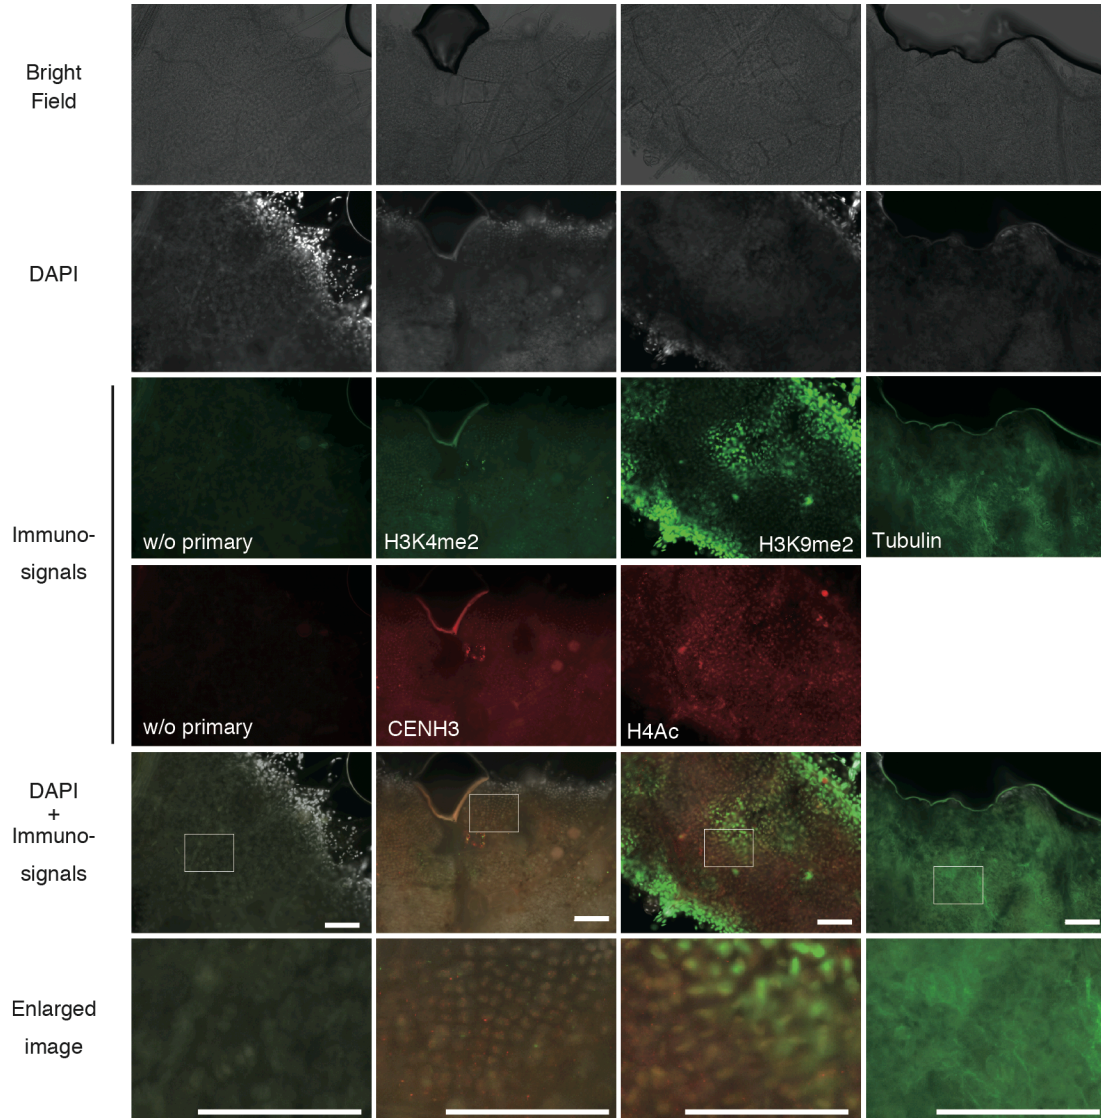

**Figure S6. Two-dimensional imaging of ePro-ClearSee treated sunflower leaves depicting immunosignals of epigenetic modifications and tubulin. Scale bar, 100  $\mu$ m.**

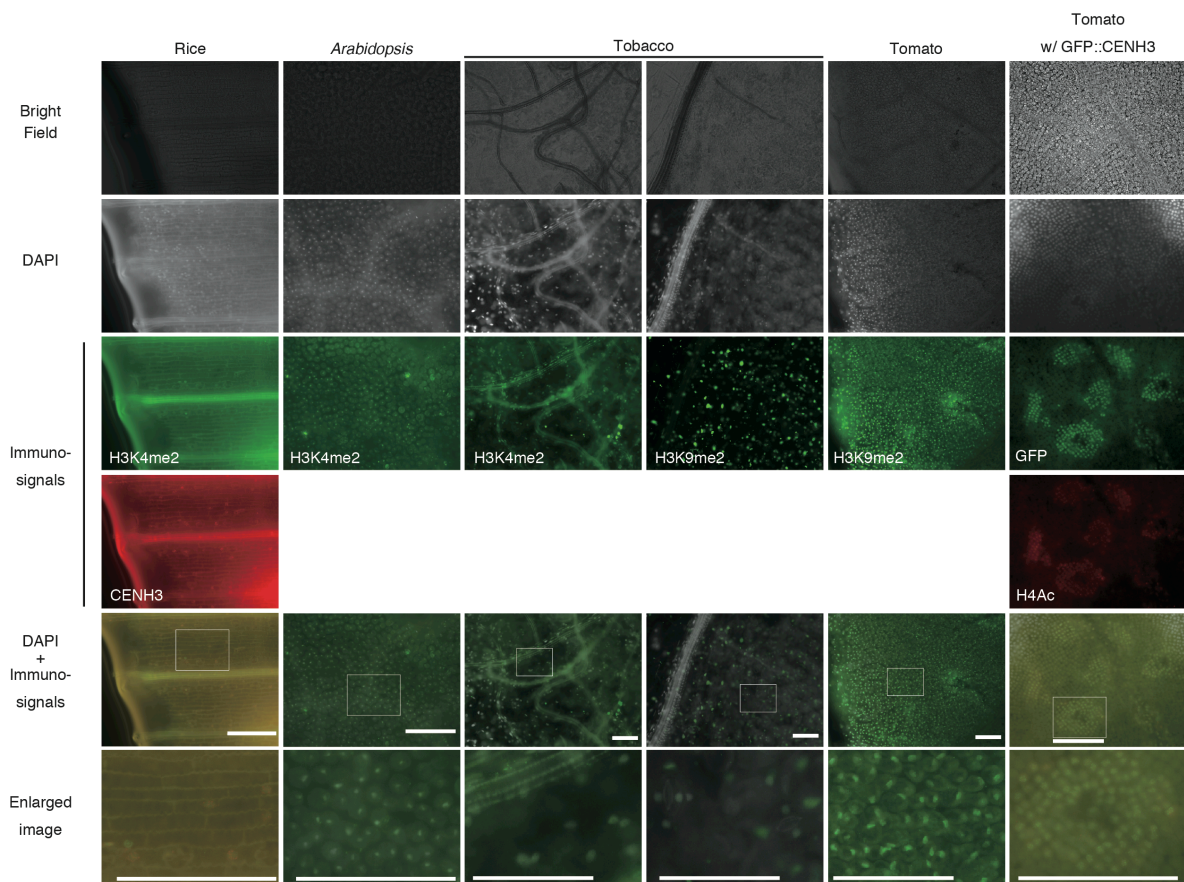

**Figure S7. Two-dimensional imaging of ePro-ClearSee treated leaves depicting immunosignals of epigenetic modifications.** Scale bar, 100  $\mu\text{m}$ .



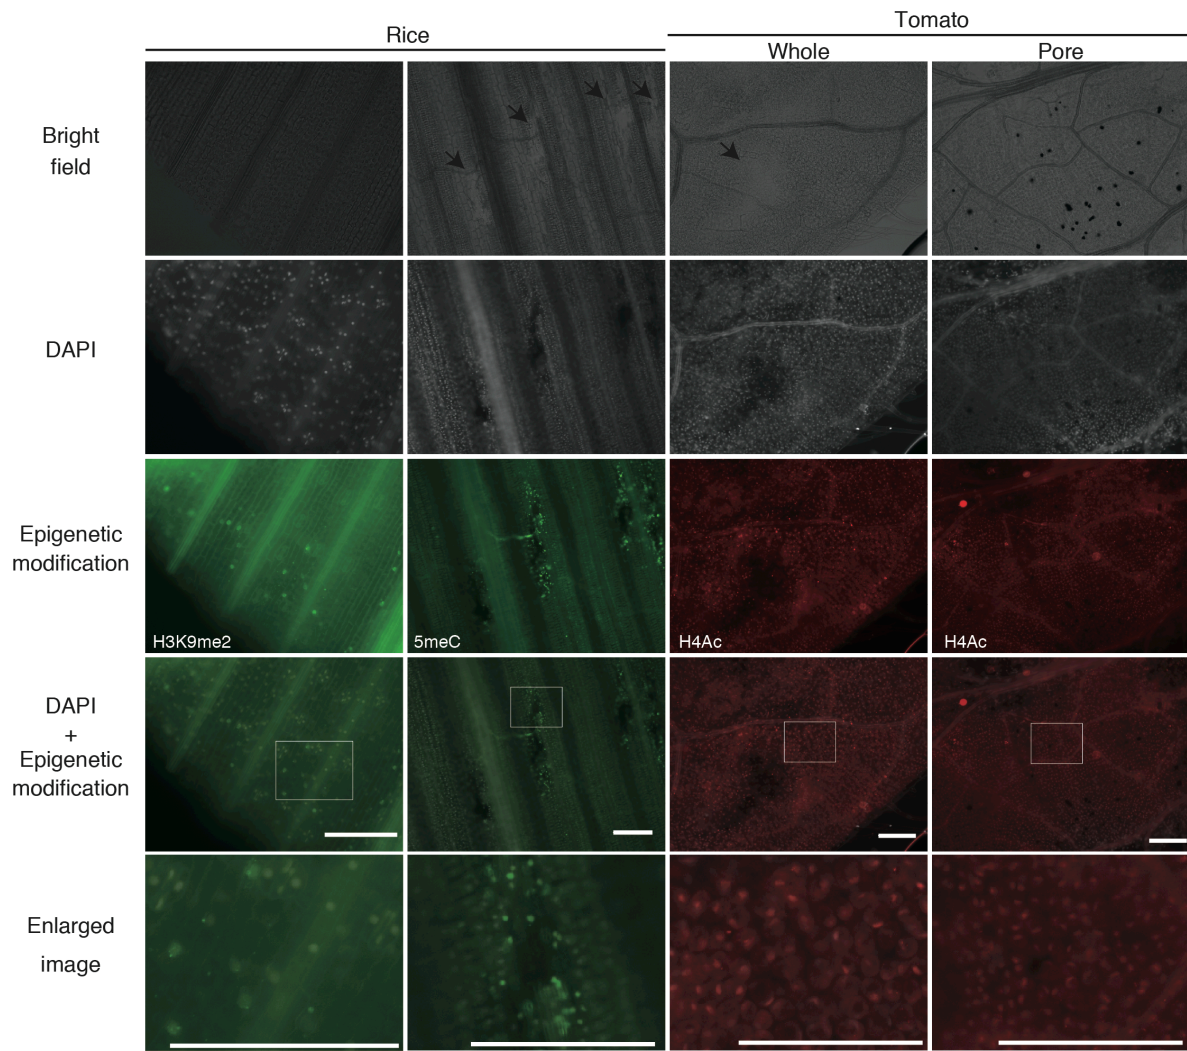

**Figure S8. Two-dimensional imaging of ePro-ClearSee treated damaged leaves depicting immunosignals of epigenetic modifications.** Scale bar, 100  $\mu$ m. Arrows in bright field indicate damaged regions. Dots in bright field of tomato 'pore' are pores by a needle.

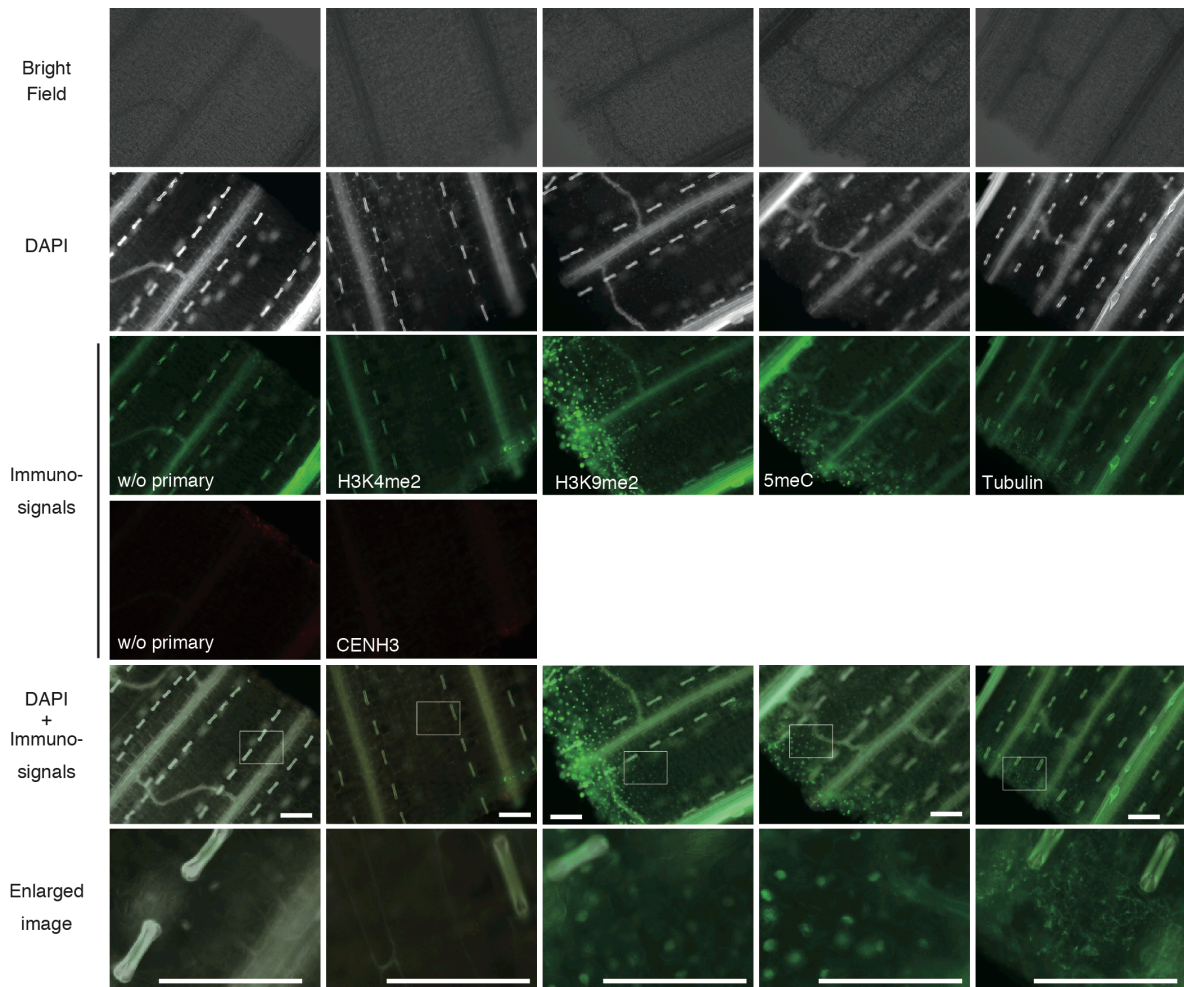

**Figure S9.** Two-dimensional imaging of barley leaves treated by Sauer's method depicting immunosignals of epigenetic modifications and tubulin. Scale bar, 100  $\mu\text{m}$ .

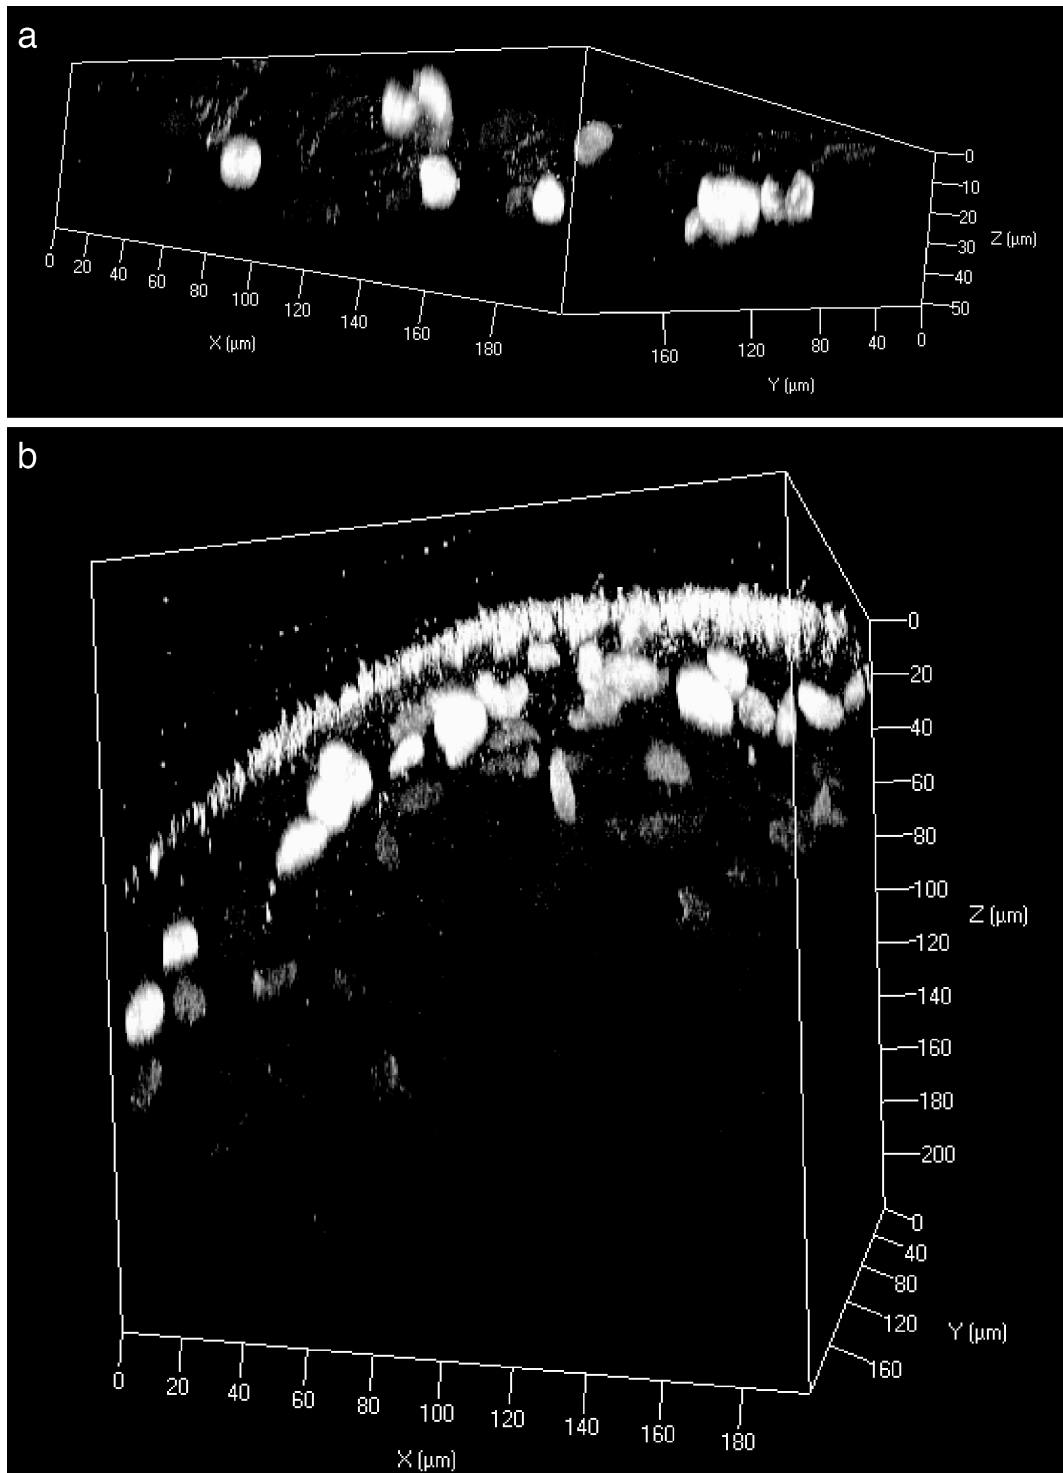

**Figure S10. Three-dimensional imaging of an ePro-ClearSee-treated garlic leaf (a) and root (b) depicting immunosignals of di-methylated histone H3 at Lys9.**

**Movie S1. Optical sections of an ePro-ClearSee treated wheat leaf depicting immunosignals.**

Immunosignals of di-methylated histone H3 at Lys9 (green) and CENH3 (red) were visualized with DAPI

stained nuclei (gray).
